# Supplementary material
Source: Royal Society of Chemistry journal article supplement (doi:10.1039/d5va00495k)
Supplement: d5va00495k1.pdf [file d5va00495k1.pdf]

**Supplementary Information**  
**Estimation of the long-term contribution of residential solid fuel burning  
to ambient PM<sub>2.5</sub>: a fuzzy clustering approach**

Carolina Estuardo-Norambuena<sup>a,b\*</sup>; Ana María Villalobos<sup>a</sup>; Hector Jorquera<sup>a,b</sup>

<sup>a</sup>Departamento de Ingeniería Química y Bioprocesos, Pontificia Universidad Católica de Chile, Avda. Vicuña Mackenna 4860, Santiago, 7820436, Chile

<sup>b</sup>Centro de Desarrollo Urbano Sustentable (CEDEUS), Los Navegantes 1963, Santiago, Providencia, 7520246, Chile

\*Corresponding author, Email: [caestuardo@uc.cl](mailto:caestuardo@uc.cl)

## CONTENTS

### Figure captions.

Figure S1: Bivariate plots wind direction /temperature for the solution of clusters found for the city of Santiago

Figure S2: Bivariate plots wind direction /wind speed for the solution of clusters found for the city of Santiago

Figure S3 Bivariate plots wind direction /wind speed for the solution of clusters found for the city of Temuco

Figure S4 Bivariate plots wind direction /temperature for the solution of clusters found for the city of Temuco

Figure S5: Bivariate plots wind direction /wind speed for the solution of clusters found for the city of Krakow

Figure S6 Bivariate plots wind direction /wind speed for the solution of clusters found for the city of Krakow

Figure S7 Time variability comparisons for RSFB estimates in Krakow coming from RM (Tobler et al, 2021) and FUSTA methodology (this work).

Figure S8: Temporal Theil-Sen trends estimated for RSFB  $PM_{2.5}$  in the Cities of Santiago (a), Temuco (b) and Krakow (c)

### Tables.

Table S1: Coefficient of correlation between the cluster of RSFB for Santiago ( $PM_{2.5\_5}$ ) and other clusters of the same city

Table S2: Coefficient of correlation between the cluster of RSFB for Temuco ( $PM_{2.5\_2}$ ) and other clusters of the same city

Table S3: Coefficient of correlation between the cluster of RSFB for Krakow ( $PM_{2.5\_4}$ ) and other clusters of the same city

Table S4. Results of the Santiago L-Model Regression

Table S5. Confidence Interval Regression for the Application of the Santiago L-Model

Table S6. Results of the Temuco L-Model Regression

Table S7. Confidence Interval Regression for the Application of the Temuco L-Model

Table S8. Results of the Krakow L-Model Regression

Table S9. Confidence Interval Regression for the Application of the Krakow L-Model

Table S10: Correlation coefficients between the receptor model for Santiago and other clusters within the same city.

Table S11: Correlation coefficients between the receptor model for Temuco and other clusters within the same city.

Table S12: Correlation coefficients between the receptor model for Krakow and other clusters within the same city.

## Figures

Figure S1: Bivariate plots wind direction /temperature for the solution of clusters found for the city of Santiago

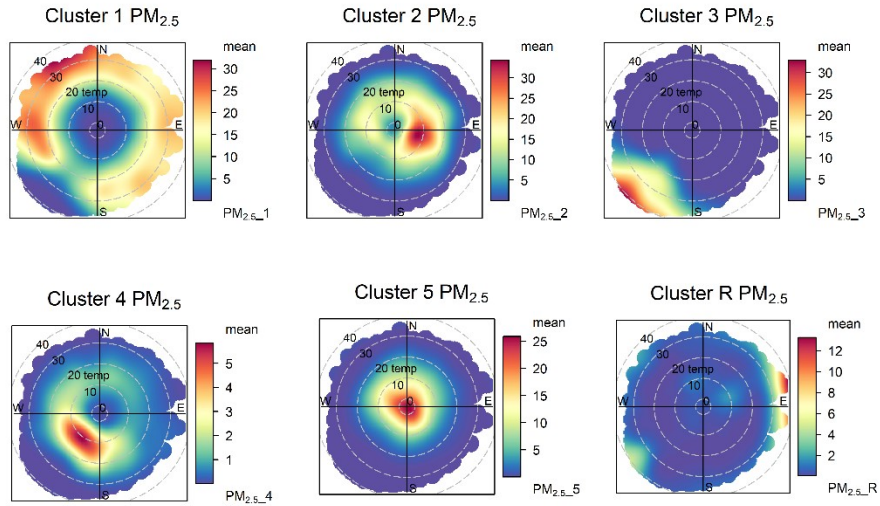

Figure S2: Bivariate plots wind direction /wind speed for the solution of clusters found for the city of Santiago

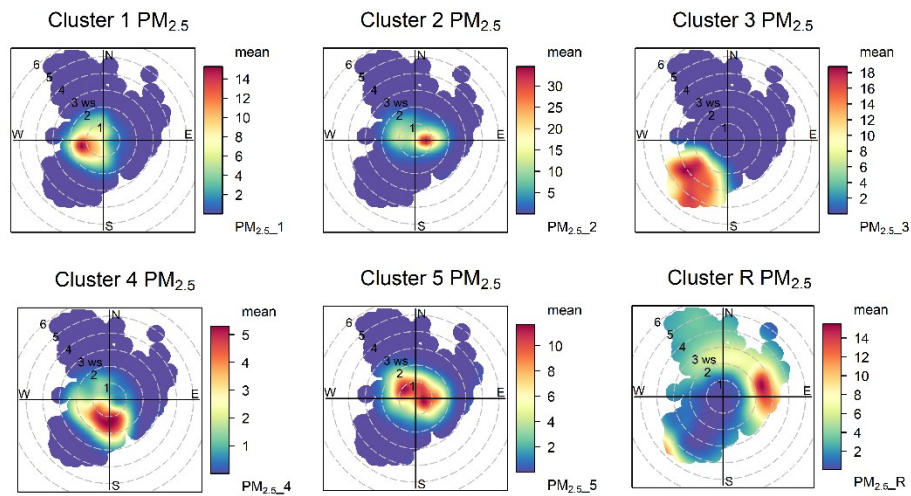

Figure S3 Bivariate plots wind direction /wind speed for the solution of clusters found for the city of Temuco

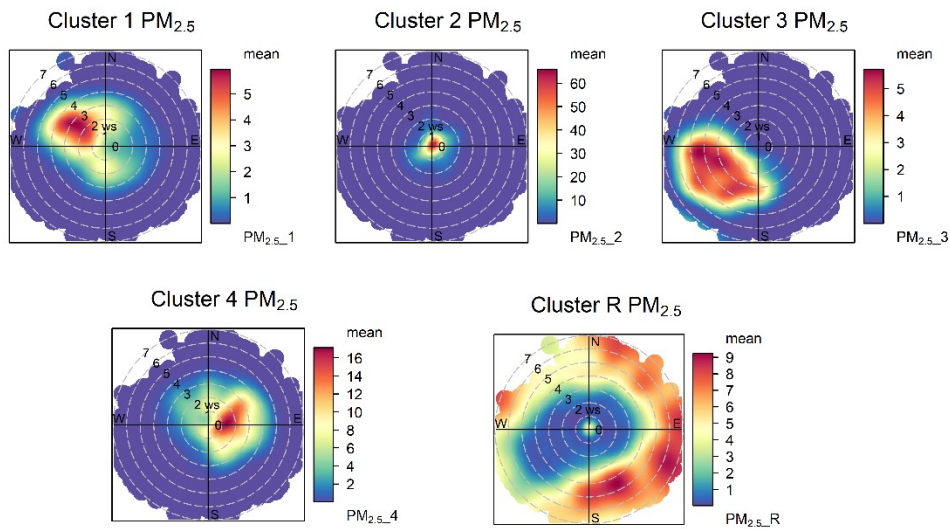

Figure S4 Bivariate plots wind direction /temperature for the solution of clusters found for the city of Temuco

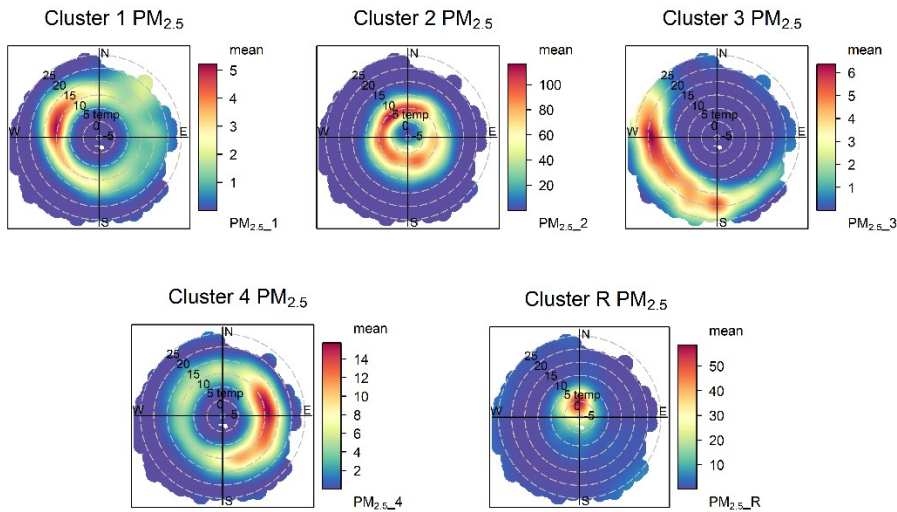

Figure S5: Bivariate plots wind direction /wind speed for the solution of clusters found for the city of Krakow

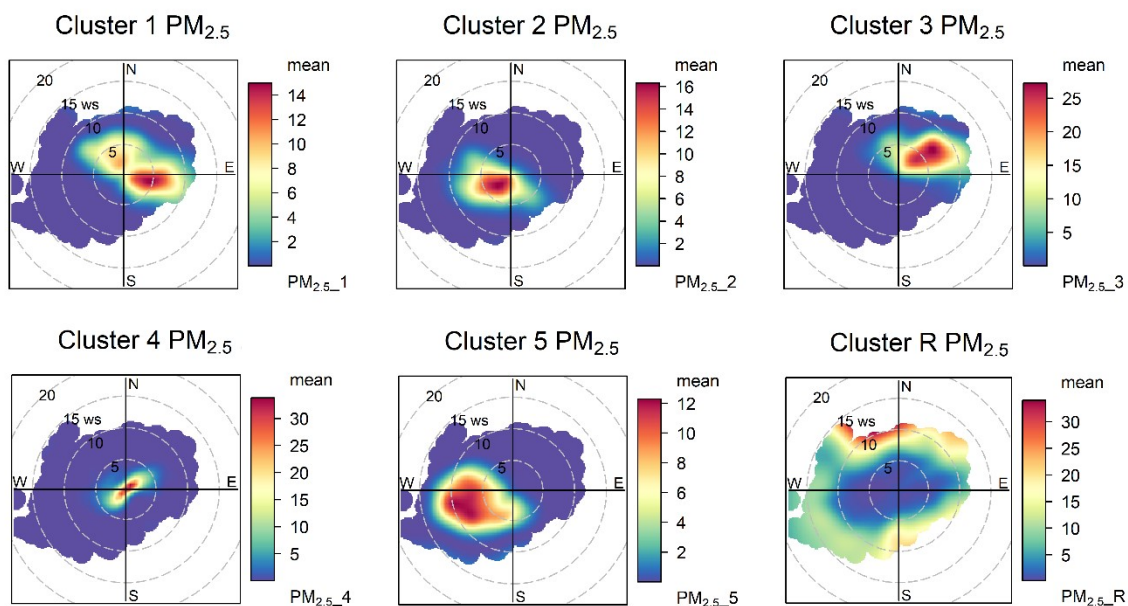

Figure S6 Bivariate plots wind direction /wind speed for the solution of clusters found for the city of Krakow

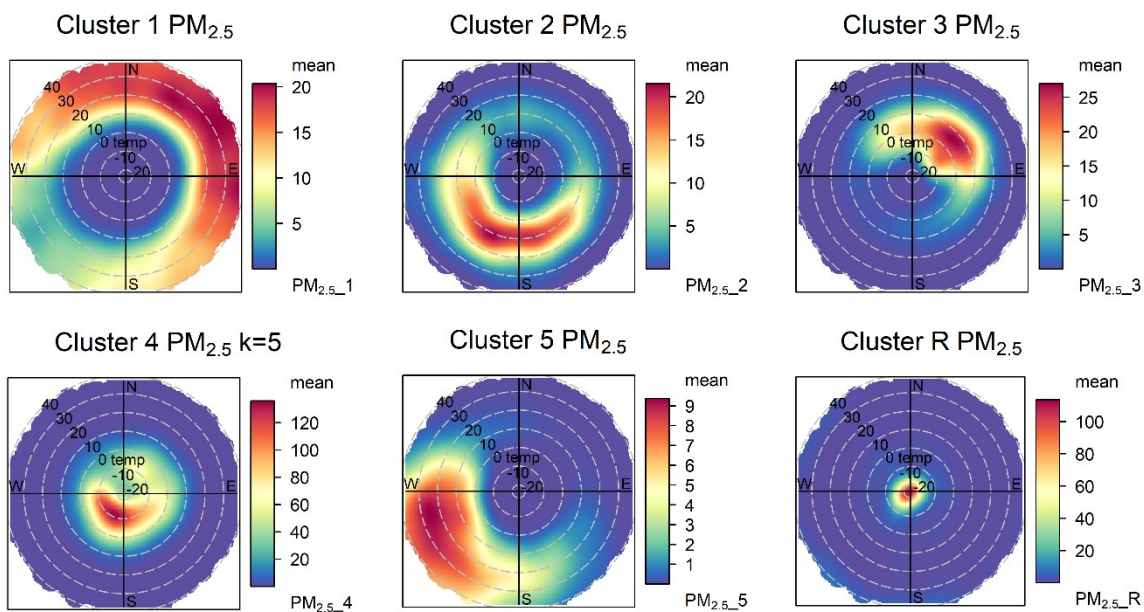

Figure S7 Time variability comparisons for RSFB estimates in Krakow from RM (Tobler et al, 2021) and from FUSTA methodology (this work).

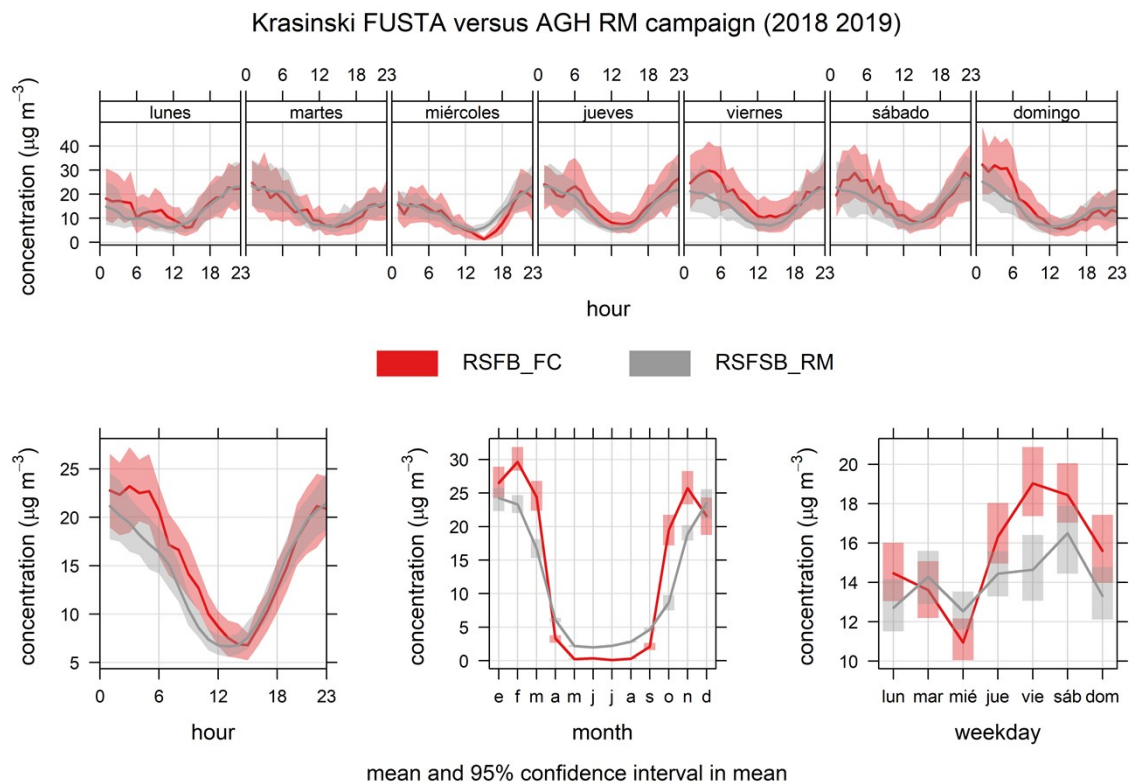

Figure S8: Temporal Theil-Sen trends estimated for RSFB PM<sub>2.5</sub> in the Cities of Santiago (a), Temuco (b) and Krakow (c)

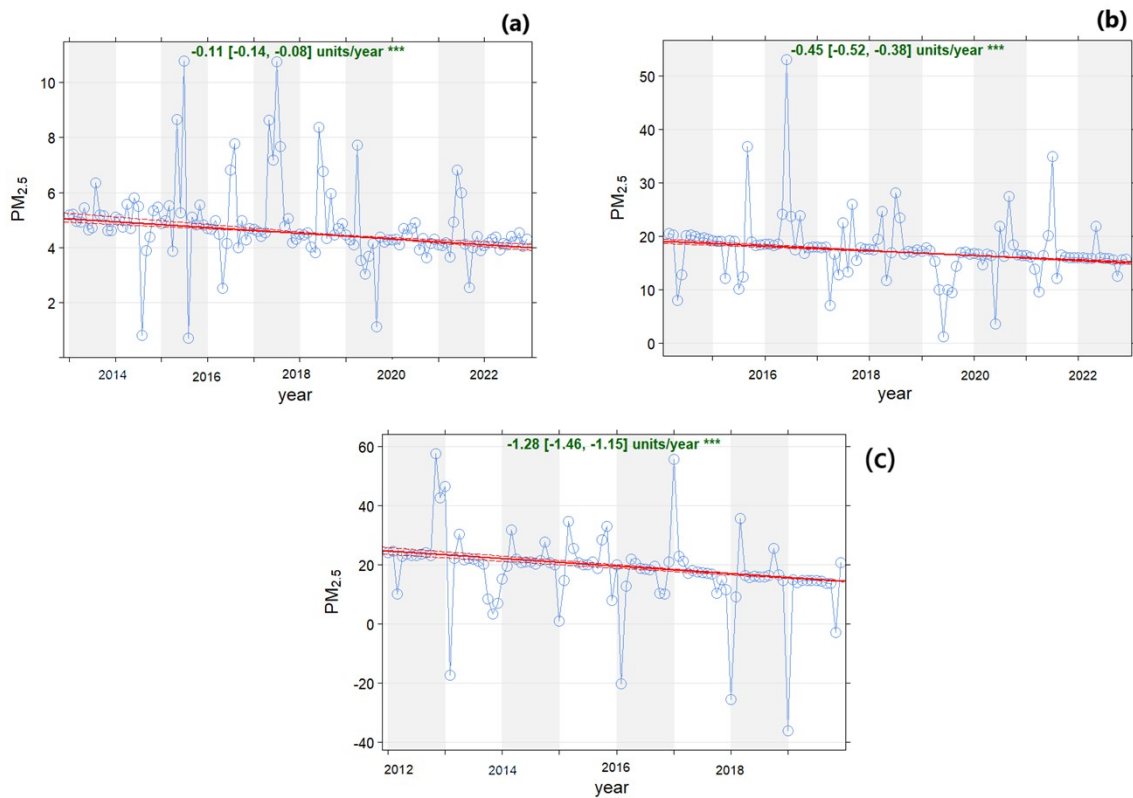

## Tables

Table S1: Coefficient of correlation between the cluster of RSFB for Santiago (PM<sub>2.5\_5</sub>) and other clusters in the same city

| Cluster             | r     | r <sup>2</sup> |
|---------------------|-------|----------------|
| PM <sub>2.5_1</sub> | -0.25 | 0.06           |
| PM <sub>2.5_2</sub> | 0.04  | 0.00           |
| PM <sub>2.5_3</sub> | -0.23 | 0.05           |
| PM <sub>2.5_4</sub> | -0.22 | 0.05           |

Table S2: Coefficient of correlation between the cluster of RSFB for Temuco (PM<sub>2.5\_2</sub>) and other clusters in the same city

| Cluster             | r     | r <sup>2</sup> |
|---------------------|-------|----------------|
| PM <sub>2.5_1</sub> | -0.28 | 0.08           |
| PM <sub>2.5_3</sub> | -0.17 | 0.03           |
| PM <sub>2.5_4</sub> | -0.10 | 0.01           |

Table S3: Coefficient of correlation between the cluster of RSFB for Krakow (PM<sub>2.5\_4</sub>) and other clusters in the same city

| Cluster             | r     | r <sup>2</sup> |
|---------------------|-------|----------------|
| PM <sub>2.5_1</sub> | -0.34 | 0.12           |
| PM <sub>2.5_2</sub> | -0.22 | 0.05           |
| PM <sub>2.5_3</sub> | -0.13 | 0.02           |
| PM <sub>2.5_5</sub> | -0.30 | 0.09           |

Table S4. Results of the Santiago L-Model Regression

| Method | Intercept | Slope | Angle (degrees) | P-perm (1-tailed) |
|--------|-----------|-------|-----------------|-------------------|
| OLS    | 2.69      | 0.78  | 37.80           | 0.03              |
| MA     | 1.92      | 0.91  | 42.34           | 0.03              |
| SMA    | 1.84      | 0.92  | 42.76           | NA                |
| RMA    | 1.88      | 0.92  | 42.51           | 0.03              |

Table S5. Confidence Interval Regression for the Application of the Santiago L-Model

| Method | 2.5%-Intercept | 97.5%-Intercept | 2.5%-Slope | 97.5%-Slope |
|--------|----------------|-----------------|------------|-------------|
| OLS    | -1.80          | 7.17            | 0.20       | 1.35        |
| MA     | -4.64          | 4.98            | 0.37       | 2.06        |
| SMA    | -2.40          | 4.19            | 0.51       | 1.67        |
| RMA    | -4.88          | 4.93            | 0.38       | 2.11        |

Table S6. Results of the Temuco L-Model Regression

| Method | Intercept | Slope | Angle (degrees) | P-perm (1-tailed) |
|--------|-----------|-------|-----------------|-------------------|
| OLS    | -1.88     | 0.93  | 42.89           | 0.02              |
| MA     | -2.97     | 0.95  | 43.68           | 0.02              |
| SMA    | -3.02     | 0.96  | 43.72           | NA                |
| RMA    | -3.04     | 0.96  | 43.73           | 0.02              |

Table S7. Confidence Interval Regression for the Application of the Temuco L-Model

| Method | 2.5%-Intercept | 97.5%-Intercept | 2.5%-Slope | 97.5%-Slope |
|--------|----------------|-----------------|------------|-------------|
| OLS    | -12.08         | 8.32            | 0.70       | 1.16        |
| MA     | -14.05         | 5.80            | 0.75       | 1.22        |
| SMA    | -13.57         | 5.33            | 0.76       | 1.21        |
| RMA    | -14.24         | 5.68            | 0.75       | 1.22        |

Table S8. Results of the Krakow L-Model Regression

| Method | Intercept | Slope | Angle (degrees) | P-perm (1-tailed) |
|--------|-----------|-------|-----------------|-------------------|
| OLS    | -1.30     | 1.20  | 50.27           | 0.01              |
| MA     | -5.22     | 1.49  | 56.18           | 0.01              |
| SMA    | -4.11     | 1.41  | 54.67           | NA                |
| RMA    | -6.07     | 1.55  | 57.25           | 0.01              |

Table S9. Confidence Interval Regression for the Application of the Krakow L-Model

| Method | 2.5%-Intercept | 97.5%-Intercept | 2.5%-Slope | 97.5%-Slope |
|--------|----------------|-----------------|------------|-------------|
| OLS    | -1.74          | -0.85           | 1.19       | 1.22        |
| MA     | -5.52          | -4.94           | 1.47       | 1.51        |
| SMA    | -4.35          | -3.88           | 1.39       | 1.43        |
| RMA    | -6.38          | -5.77           | 1.53       | 1.58        |

Table S10: Correlation coefficients between the receptor model for Santiago and other clusters within the same city.

| Cluster              | r     | r <sup>2</sup> |
|----------------------|-------|----------------|
| PM <sub>2.5</sub> _1 | -0.41 | 0.16           |
| PM <sub>2.5</sub> _2 | 0.56  | 0.32           |
| PM <sub>2.5</sub> _3 | -0.85 | 0.73           |
| PM <sub>2.5</sub> _4 | -0.77 | 0.59           |

Table S11: Correlation coefficients between the receptor model for Temuco and other clusters within the same city.

| Cluster              | r     | r <sup>2</sup> |
|----------------------|-------|----------------|
| PM <sub>2.5</sub> _1 | 0.16  | 0.02           |
| PM <sub>2.5</sub> _3 | -0.48 | 0.23           |
| PM <sub>2.5</sub> _4 | 0.00  | 0.00           |

Table S12: Correlation coefficients between the receptor model for Krakow and other clusters within the same city.

| Cluster              | r     | r <sup>2</sup> |
|----------------------|-------|----------------|
| PM <sub>2.5</sub> _1 | -0.43 | 0.18           |
| PM <sub>2.5</sub> _2 | -0.18 | 0.03           |
| PM <sub>2.5</sub> _3 | 0.44  | 0.20           |
| PM <sub>2.5</sub> _4 | -0.56 | 0.31           |
